# Supplementary material
Source: PubMed Central journal article supplement (PMC4060678)
Supplement: 1323962111_pnas.201323962SI.pdf [file 1323962111_pnas.201323962SI.pdf]

# Supporting Information

Vaithianathan and Matthews 10.1073/pnas.1323962111

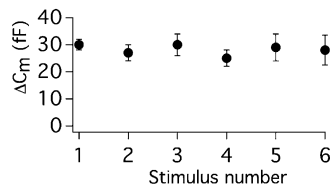

**Fig. S1.** Capacitance responses to 10-ms depolarizations given at intervals of 10 s. The size of the capacitance response evoked by 10-ms voltage-clamp depolarizations did not change during a series of stimuli separated by 10 s, which indicates that this interval was sufficient for refilling of the ultrafast pool after it was depleted. Data points are mean  $\pm$  SEM from seven terminals.

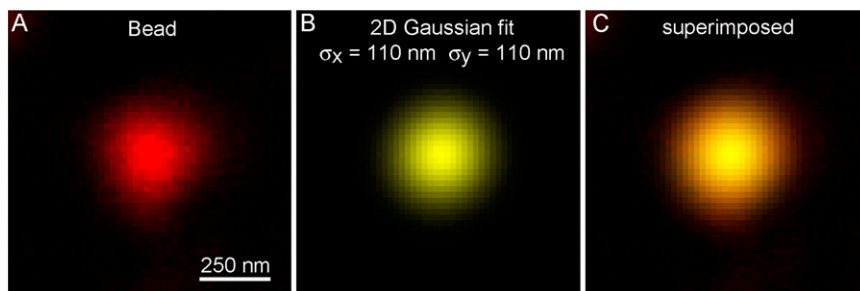

**Fig. S2.** Measurement of the point-spread function of the microscope. (A) Image of a single 27-nm bead. (B) Two-dimensional Gaussian fitted to A by using Igor Pro. The indicated SD (110 nm) corresponds to a FWHM of 259 nm. (C) Superposition of fit (yellow) with bead image (red).

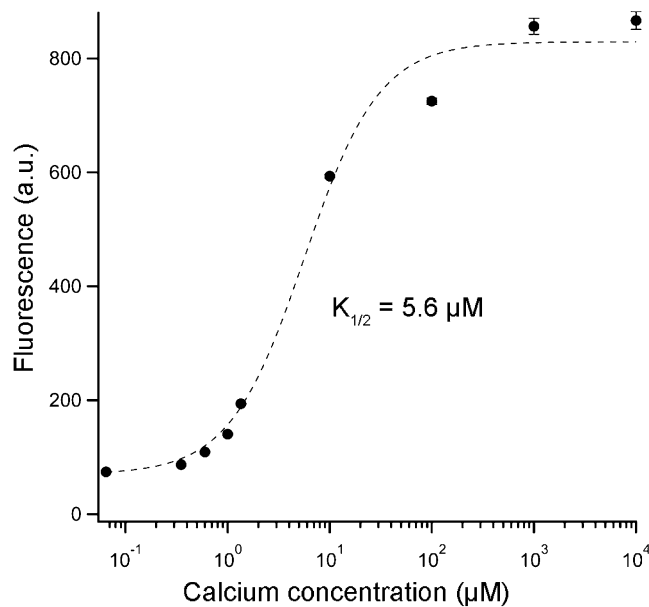

**Fig. S3.** Calibration of Fluo-2LA calcium indicator dye. Calcium concentration standards (World Precision Instruments; Invitrogen/Molecular Probes) were mixed with 100  $\mu$ M Fluo-2LA and loaded into patch pipettes. Confocal images were then acquired in a  $4.1 \mu$ m  $\times$   $4.1 \mu$ m region in the center of the shank of the pipette to measure the fluorescence at each calcium concentration. Data points represent the average ( $\pm$  SEM) of six measurements. The dashed line indicates a Hill equation with  $K_{1/2} = 5.6 \mu$ M and a Hill coefficient of 1.2, fitted to the data by using Igor Pro.
